# Supplementary material for: 68Ga-P15-041, A Novel Bone Imaging Agent for Diagnosis of Bone Metastases
Source: PubMed Central journal article supplement (PMC8654731; doi:10.3389/fonc.2021.766851), 2021-11-25
Supplement: Table_1.pdf [file Table_1.pdf]

## **<sup>68</sup>Ga-P15-041, a novel bone imaging agent for diagnosis of bone metastases**

**Supplementary Table 1.** The specific activity of <sup>68</sup>Ga-P15-041 used in each patient

|           | Gender | Age(y) | The specific activity of <sup>68</sup> Ga-P15-041(MBq/umol) |
|-----------|--------|--------|-------------------------------------------------------------|
| Patient1  | Male   | 61     | 0.080                                                       |
| Patient2  | Female | 57     | 0.070                                                       |
| Patient3  | Male   | 38     | 0.080                                                       |
| Patient4  | Female | 60     | 0.080                                                       |
| Patient5  | Female | 54     | 0.091                                                       |
| Patient6  | Female | 53     | 0.094                                                       |
| Patient7  | Female | 47     | 0.084                                                       |
| Patient8  | Male   | 27     | 0.084                                                       |
| Patient9  | Female | 61     | 0.073                                                       |
| Patient10 | Female | 56     | 0.080                                                       |
| Patient11 | Female | 48     | 0.084                                                       |
| Patient12 | Female | 50     | 0.084                                                       |
| Patient13 | Female | 62     | 0.073                                                       |
| Patient14 | Male   | 55     | 0.091                                                       |
| Patient15 | Female | 49     | 0.077                                                       |
| Patient16 | Male   | 67     | 0.066                                                       |
| Patient17 | Male   | 56     | 0.080                                                       |
| Patient18 | Male   | 53     | 0.080                                                       |
| Patient19 | Female | 64     | 0.080                                                       |
| Patient20 | Female | 34     | 0.087                                                       |
| Patient21 | Male   | 65     | 0.087                                                       |
| Patient22 | Male   | 57     | 0.070                                                       |
| Patient23 | Female | 69     | 0.063                                                       |
| Patient24 | Male   | 71     | 0.063                                                       |
| Patient25 | Male   | 50     | 0.084                                                       |
| Patient26 | Female | 56     | 0.084                                                       |
| Patient27 | Female | 65     | 0.073                                                       |
| Patient28 | Female | 67     | 0.091                                                       |
| Patient29 | Male   | 84     | 0.087                                                       |
| Patient30 | Male   | 73     | 0.087                                                       |
| Patient31 | Male   | 32     | 0.084                                                       |
| Patient32 | Male   | 68     | 0.080                                                       |

|           |        |    |       |
|-----------|--------|----|-------|
| Patient33 | Male   | 50 | 0.080 |
| Patient34 | Male   | 62 | 0.091 |
| Patient35 | Female | 50 | 0.084 |
| Patient36 | Female | 54 | 0.087 |
| Patient37 | Female | 63 | 0.080 |
| Patient38 | Female | 40 | 0.066 |
| Patient39 | Male   | 56 | 0.077 |
| Patient40 | Female | 50 | 0.063 |
| Patient41 | Male   | 54 | 0.063 |
| Patient42 | Female | 66 | 0.066 |
| Patient43 | Female | 71 | 0.066 |
| Patient44 | Female | 55 | 0.056 |
| Patient45 | Female | 55 | 0.063 |
| Patient46 | Male   | 64 | 0.066 |
| Patient47 | Male   | 44 | 0.052 |
| Patient48 | Male   | 64 | 0.049 |
| Patient49 | Female | 50 | 0.063 |
| Patient50 | Female | 50 | 0.063 |
| Patient51 | Female | 48 | 0.059 |
